# Supplementary material for: Analysis of differentially expressed mitochondrial proteins in chromophobe renal cell carcinomas and renal oncocytomas by 2-D gel electrophoresis
Source: PubMed Central journal article supplement — Int J Biol Sci. 2010 Apr 23;6(3):213–24. doi: 10.7150/ijbs.6.213 (PMC2862395; doi:10.7150/ijbs.6.213), 2010-04-23

**Supplementray Figure 1.** Sucrose-density gradient purification of crude tumour mitochondria (A) and Western blot analysis of cellular fractionation using mitochondrial and cytosolic markers (B). RO – renal oncocytoma; chRRC – chromophobe RCC; a-g – mitochondrial fractions.

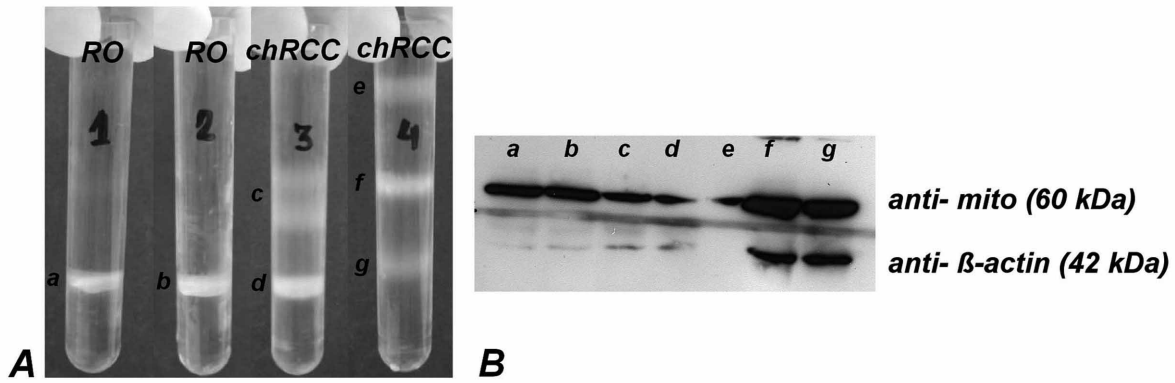

Supplement: ijbsv06p0213s1.pdf [file ijbsv06p0213s1.pdf]
