# Supplementary material for: Analysis of differentially expressed mitochondrial proteins in chromophobe renal cell carcinomas and renal oncocytomas by 2-D gel electrophoresis
Source: PubMed Central journal article supplement — Int J Biol Sci. 2010 Apr 23;6(3):213–24. doi: 10.7150/ijbs.6.213 (PMC2862395; doi:10.7150/ijbs.6.213), 2010-04-23
Supplement: ijbsv06p0213s2.pdf [file ijbsv06p0213s2.pdf]

Supplementary Table 1. Identification of 81 spots (score >50) from the 2D-gels shown in Figure 3.

| Spot ID | Protein                                                            | Gene       | Accession Nr. | MW    | pI   | Score | Coverage, % | Matched peptides |
|---------|--------------------------------------------------------------------|------------|---------------|-------|------|-------|-------------|------------------|
| 1       | cytochrome b5                                                      | CYB5R1     | 353818        | 11130 | 5.02 | 250   | 83.5        | 19               |
| 2       | proapolipoprotein lipoprotein G ln I                               |            | 178775        | 28944 | 5.45 | 901   | 67.9        | 43               |
|         |                                                                    |            | 229479        | 28329 | 5.27 | 694   | 52.7        | 32               |
| 3       | apolipoprotein A-I                                                 | APOA1      | 90108664      | 28061 | 5.27 | 2282  | 73.7        | 92               |
|         | lipoprotein G ln I                                                 |            | 229479        | 28329 | 5.27 | 1634  | 56.3        | 73               |
|         | ATP synthase, H <sup>+</sup> transporting, gamma polypeptide 1     | ATP5C1     | 16877071      | 33002 | 9.23 | 133   | 13.1        | 5                |
| 4       | NADH dehydrogenase FeS protein                                     | NDUFS      | 227297        | 27528 | 8.28 | 333   | 36.1        | 15               |
|         | proapolipoprotein                                                  |            | 178775        | 28944 | 5.45 | 269   | 22.5        | 9                |
|         | lipoprotein G ln I                                                 |            | 229479        | 28329 | 5.27 | 219   | 17.1        | 7                |
|         | peroxiredoxin 3 isoform a precursor                                | PRDX3      | 5802974       | 28017 | 7.67 | 115   | 10.2        | 2                |
| 5       | NADH dehydrogenase FeS protein                                     | NDUFS      | 227297        | 27528 | 8.28 | 245   | 23.3        | 10               |
|         | enoyl-CoA hydratase                                                | ECHD       | 1922287       | 31807 | 8.34 | 220   | 22.1        | 6                |
| 6       | NADH dehydrogenase (ubiquinone) Fe-S protein 3                     | NDUFS3     | 4758788       | 30337 | 6.99 | 905   | 59.5        | 49               |
|         | heat shock protein 27                                              | HSP27      | 662841        | 22427 | 7.83 | 207   | 30.7        | 7                |
|         | ATP synthase, H <sup>+</sup> transporting, gamma polypeptide 1     | ATP5C1     | 16877071      | 33002 | 9.23 | 193   | 19.1        | 5                |
| 7       | prohibitin                                                         | PHB        | 4505773       | 29843 | 5.57 | 930   | 77.2        | 56               |
| 8       | prohibitin                                                         | PHB        | 4505773       | 29843 | 5.57 | 881   | 63.2        | 41               |
| 9       |                                                                    |            |               |       |      | <50   |             |                  |
| 10      | prohibitin                                                         | PHB        | 4505773       | 29843 | 5.57 | 802   | 75.7        | 40               |
|         | cathepsin D preproprotein                                          | CTSD       | 4503143       | 45037 | 6.10 | 318   | 23.1        | 9                |
| 11      | aminoacylase 1                                                     | ACY1       | 4501901       | 46084 | 5.77 | 730   | 51.7        | 48               |
|         | beta actin                                                         | ACTB       | 4501885       | 42052 | 5.29 | 304   | 24.0        | 12               |
|         | ATP-specific succinyl-CoA synthetase beta subunit                  | SUCLA2     | 3766197       | 46732 | 5.84 | 273   | 14.1        | 6                |
| 12      | aminoacylase 1                                                     | ACY1       | 4501901       | 46084 | 5.77 | 264   | 23.0        | 9                |
|         | ATP-specific succinyl-CoA synthetase beta subunit                  | SUCLA2     | 3766197       | 46732 | 5.84 | 124   | 9.6         | 4                |
| 13      | ATP synthase, H <sup>+</sup> transporting, alpha subunit 1         | ATP5A1     | 127798841     | 59785 | 9.07 | 823   | 34.7        | 34               |
|         | peroxiredoxin 1                                                    | PRXD1      | 4505591       | 22324 | 8.27 | 200   | 30.7        | 6                |
| 14      | ATP synthase, H <sup>+</sup> transporting, alpha subunit precursor | ATP5A1     | 4757810       | 59828 | 9.16 | 631   | 29.1        | 29               |
|         | peroxiredoxin 1                                                    | PRDX1      | 4505591       | 22324 | 8.27 | 266   | 41.2        | 10               |
|         | mitochondrial ATP synthase, O subunit precursor                    | ATP5O      | 4502303       | 23377 | 9.97 | 146   | 14.6        | 3                |
| 15      | manganese superoxide dismutase                                     | SOD2       | 34709         | 24891 | 8.35 | 199   | 21.2        | 10               |
| 16      | neuropolyptide h3                                                  | HCNP       | 913159        | 21027 | 7.42 | 502   | 57.0        | 25               |
| 17      | unknown                                                            | AF007162.1 | 2852648       | 22435 | 7.18 | 347   | 30.4        | 19               |
| 18      | beta actin                                                         | ACTB       | 4501885       | 42052 | 5.29 | 295   | 24.0        | 11               |
|         | alpha actin                                                        | ACTA       | 178027        | 42480 | 5.23 | 265   | 23.9        | 10               |
| 19      | beta actin                                                         | ACTB       | 4501885       | 42052 | 5.29 | 158   | 15.5        | 5                |
| 20      | ribosomal protein P0                                               | RPLP0      | 4506667       | 34423 | 5.71 | 226   | 24.6        | 9                |
|         | L-lactate dehydrogenase B                                          | LDHB       | 4557032       | 36900 | 5.71 | 164   | 12.6        | 6                |
| 21      | L-lactate dehydrogenase B                                          | LDHB       | 4557032       | 36900 | 5.71 | 245   | 19.8        | 11               |
| 22      | ATP synthase subunit D                                             | ATP5H      | O75947        | 18537 | 5.21 | 1636  | 71.4        | 90               |
| 23      | cytochrome c oxidase subunit 5A                                    | COX5A      | P20674        | 16923 | 6.30 | 288   | 22.7        | 87               |
| 24      | cytochrome c oxidase subunit 5A                                    | COX5A      | P20674        | 16923 | 6.30 | 2671  | 22.7        | 104              |
| 25      | piruvate dehydrogenase E1 component subunit beta                   | PDHB       | P11177        | 39550 | 6.20 | 2416  | 38.4        | 108              |
| 26      | piruvate dehydrogenase E1 component subunit beta                   | PDHB       | P11177        | 39550 | 6.20 | 2361  | 38.4        | 109              |
| 27      | enoyl-CoA hydratase                                                | HADHA      | P30084        | 31823 | 8.34 | 158   | 11.7        | 10               |
| 28      | 3,2-trans-enoyl-CoA isomerase                                      | EHHADH     | P42126        | 33080 | 8.80 | 354   | 22.8        | 53               |
|         | ATP synthase, subunit gamma                                        | ATP5C1     | P36542        | 33032 | 9.23 | 197   | 21.1        | 11               |
| 29      | thioredoxin-dependent peroxide reductase                           | PRDX3      | P30048        | 28017 | 7.67 | 69    | 7.0         | 6                |
| 30      | voltage-dependent anion-selective channel protein 2                | VDAC2      | P45880        | 32060 | 7.49 | 283   | 20.1        | 35               |
| 31      | delta(3,5)-delta(2,4)-dienoyl-CoA isomerase                        | ECH1       | Q13011        | 36136 | 8.16 | 581   | 35.1        | 92               |
|         | voltage-dependent anion-selective channel protein 2                | VDAC2      | P45880        | 32060 | 7.49 | 282   | 20.1        | 28               |
| 32      | voltage-dependent anion-selective channel protein 1                | VDAC1      | P21796        | 30868 | 8.62 | 453   | 23.0        | 61               |
|         | voltage-dependent anion-selective channel protein 2                | VDAC2      | P45880        | 32060 | 7.49 | 317   | 20.4        | 29               |
| 33      | voltage-dependent anion-selective channel protein 1                | VDAC1      | P21796        | 30868 | 8.62 | 414   | 30.0        | 48               |
|         | voltage-dependent anion-selective channel protein 2                | VDAC2      | P45880        | 32060 | 7.49 | 336   | 26.9        | 49               |
| 34      | electron transfer flavoprotein, subunit alpha                      | ETF A      | P13804        | 35400 | 8.62 | 100   | 12.3        | 8                |
| 35      |                                                                    |            |               |       |      | <50   |             |                  |
| 36      | voltage-dependent anion-selective channel protein 1                | VDAC1      | P21796        | 30868 | 8.62 | 173   | 11.7        | 9                |
|         | ESI protein homolog                                                | ESI        | P30042        | 28495 | 8.50 | 171   | 14.2        | 21               |
| 37      | ESI protein homolog                                                | ESI        | P30042        | 24495 | 8.50 | 82    | 10.4        | 4                |
| 38      | superoxide dismutase                                               | SOD2       | P04179        | 24878 | 8.35 | 123   | 14.0        | 11               |
| 39      | superoxide dismutase                                               | SOD2       | P04179        | 24878 | 8.35 | 271   | 27.9        | 32               |
| 40      | unknown                                                            |            |               |       |      |       |             |                  |
| 41      | enoyl-CoA hydratase domain-containing protein 3                    | ECHDC3     | Q96DC8        | 33015 | 8.9  | 1031  | 31.4        | 53               |
|         | adenylate kinase 2                                                 | AK2        | P54819        | 26689 | 7.67 | 447   | 18.8        | 31               |
| 42      |                                                                    |            |               |       |      | <50   |             |                  |
| 43      | voltage-dependent anion-selective channel protein 1                | VDAC1      | P21796        | 30868 | 8.62 | 4098  | 52.3        | 161              |
|         | voltage-dependent anion-selective channel protein 3                | VDAC3      | Q9Y277        | 30981 | 8.85 | 818   | <5.0        | 21               |
|         | hydroxyacyl-coenzyme A dehydrogenase                               | HADH       | Q16836        | 34313 | 8.88 | 341   | 23.9        | 20               |
| 44      | electron transfer flavoprotein, subunit beta                       | ETF B      | P38117        | 28054 | 8.24 | 542   | 42.0        | 64               |

Supplementary Table 1 (continued).

| Spot ID | Proteins identified                                                                                | Gene     | Accession Nr. | MW    | pI   | Score | Coverage, % | Matched peptides |
|---------|----------------------------------------------------------------------------------------------------|----------|---------------|-------|------|-------|-------------|------------------|
| 45      | (coiled-coil-helix) domain-containing protein 3                                                    | CHCHD3   | Q9NX63        | 26421 | 8.48 | 326   | 25.1        | 29               |
|         | protein NipSnap homolog 2                                                                          | GBAS     | O75323        | 33949 | 9.42 | 194   | 15.7        | 14               |
| 46      | (coiled-coil-helix) domain-containing protein 3                                                    | CHCHD3   | Q9NX63        | 26421 | 8.48 | 475   | 47.6        | 45               |
|         | protein NipSnap homolog 2                                                                          | GBAS     | O75323        | 33949 | 9.42 | 309   | 18.5        | 54               |
| 47      | cytochrome b-c1 complex subunit 7                                                                  | UQCRB    | P14927        | 13522 | 8.73 | 123   | 38.7        | 30               |
|         | haemoglobin subunit alpha                                                                          | HBA2     | P69905        | 15305 | 8.72 | 114   | 24.6        | 11               |
| 48      | cytochrome c oxydase subunit 5B                                                                    | COX5B    | P10606        | 13915 | 9.07 | 802   | 40.3        | 49               |
| 49      | heat shock protein HSP 90 alpha                                                                    | HSP90AA1 | P07900        | 85006 | 4.94 | 432   | 11.2        | 50               |
|         | heat shock protein HSP 90 beta                                                                     | HSP90AB1 | P08238        | 83554 | 4.97 | 312   | 7.6         | 41               |
| 50      | myosin regulatory light chain MRLC2                                                                | MYLC2B   | O14950        | 19824 | 4.71 | 376   | 57.0        | 40               |
| 51      | V-type proton ATPase subunit F                                                                     | VATF     | Q16864        | 13362 | 5.29 | 99    | 18.5        | 24               |
| 52      | adseverin                                                                                          | ADSV     | Q9Y6U3        | 80895 | 5.50 | 525   | 5.6         | 26               |
|         | apoptosis-inducing factor 1                                                                        | AIFM1    | O95831        | 67144 | 9.04 | 120   | <5.0        | 5                |
| 53      | keratin, type II cytoskeletal 1                                                                    | KRT1     | P04264        | 66149 | 8.16 | 151   | 8.7         | 17               |
|         | adservin                                                                                           | ADSV     | Q9Y6U3        | 80895 | 5.5  | 129   | <5.0        | 15               |
| 54      |                                                                                                    |          |               |       |      | <50   |             |                  |
| 55      | cytochrome b-c1 complex subunit 1                                                                  | QCR1     | P31930        | 53297 | 5.94 | 157   | <5.0        | 5                |
|         | actin, cytoplasmic 1                                                                               | ACTB     | P60709        | 42052 | 5.29 | 143   | 9.9         | 9                |
|         | tubulin alpha-1C chain                                                                             | TBA1C    | Q9BQE3        | 50548 | 4.96 | 76    | 11.6        | 9                |
| 56      | pyruvate kinase isozymes M1/M2                                                                     | PKM2     | P14618        | 58470 | 7.96 | 534   | 22.4        | 31               |
|         | L-lactate dehydrogenase B chain                                                                    | LDHB     | P07195        | 36900 | 5.71 | 57    | 5.4         | 3                |
| 57      | guanine nucleotide-binding protein, subunit beta-1                                                 | GNB1     | P62873        | 38151 | 5.60 | 360   | 11.8        | 19               |
|         | guanine nucleotide-binding protein, subunit beta-2                                                 | GNB2     | P62879        | 38048 | 5.60 | 377   | 11.8        | 20               |
|         | heat shock protein beta-1                                                                          | HSPB1    | P04792        | 22826 | 5.98 | 124   | 13.2        | 5                |
|         | L-lactate dehydrogenase B chain                                                                    | LDHB     | P07195        | 36900 | 5.71 | 76    | 5.4         | 4                |
| 58      | annexin A4                                                                                         | ANXA4    | P09525        | 36088 | 5.84 | 1199  | 69.0        | 113              |
| 59      | prohibitin                                                                                         | PHB      | P35232        | 29843 | 5.57 | 1016  | 46.3        | 59               |
|         | cathepsin                                                                                          | CATD     | P07339        | 45037 | 6.10 | 2515  | 33.0        | 117              |
| 60      | prohibitin                                                                                         | PHB      | P35232        | 29843 | 5.57 | 2392  | 60.7        | 90               |
| 61      | cathepsin                                                                                          | CATD     | P07339        | 45037 | 6.10 | 1473  | 23.3        | 76               |
| 62      | cathepsin                                                                                          | CATD     | P07339        | 45037 | 6.10 | 3407  | 33.0        | 161              |
|         | prohibitin                                                                                         | PHB      | P35232        | 29843 | 5.57 | 930   | 44.9        | 77               |
| 63      | heat shock protein beta-1                                                                          | HSPB1    | P04792        | 22826 | 5.98 | 1199  | 59.5        | 57               |
| 64      | heat shock protein beta-1                                                                          | HSPB1    | P04792        | 22826 | 5.98 | 3773  | 68.3        | 156              |
|         | NADH dehydrogenase (ubiquinone) Fe-S protein 3                                                     | NDUS3    | O75489        | 30337 | 6.99 | 429   | 36.7        | 19               |
| 65      | heat shock protein beta-1                                                                          | HSPB1    | P04792        | 22826 | 5.98 | 656   | 42.0        | 33               |
| 66      | dihydropyridyllysine-residue succinyltransferase component of 2-oxoglutarate dehydrogenase complex | DLST     | P36857        | 49041 | 9.11 | 660   | 28.3        | 104              |
| 67      | heat shock protein beta-1                                                                          | HSPB1    | P04792        | 22826 | 5.98 | 4994  | 72.2        | 205              |
| 68      | keratin, type II cytoskeletal 1                                                                    | KRT1     | P04264        | 66149 | 8.16 | 123   | 6.5         | 6                |
| 69      | keratin, type II cytoskeletal 1                                                                    | KRT1     | P04264        | 66149 | 8.16 | 126   | 7.9         | 8                |
| 70      | heat shock protein beta-1                                                                          | HSPB1    | P04792        | 22826 | 5.98 | 157   | 22.0        | 8                |
| 71      | V-type proton ATPase subunit E1                                                                    | ATP6V0E1 | P36543        | 26186 | 7.71 | 300   | 26.1        | 26               |
| 72      |                                                                                                    |          |               |       |      | <50   |             |                  |
| 73      | peroxiredoxin 6                                                                                    | PRDX6    | P30041        | 25133 | 6.00 | 1688  | 81.7        | 79               |
| 74      | cytochrome b-c1 complex subunit Rieske                                                             | UQCRCF1  | P47985        | 29934 | 8.55 | 355   | 37.2        | 55               |
|         | methylmalonate-semialdehyde dehydrogenase (acylating)                                              | ALDH6A1  | Q02252        | 58259 | 8.72 | 182   | 9.3         | 16               |
| 75      | voltage-dependent anion-selective channel protein 2                                                | VDAC2    | P45880        | 32060 | 7.49 | 410   | 33.3        | 60               |
|         | voltage-dependent anion-selective channel protein 1                                                | VDAC1    | P21796        | 30868 | 8.62 | 141   | 13.8        | 9                |
|         | keratin, type II cytoskeletal 1                                                                    | KRT1     | P04264        | 66149 | 8.16 | 137   | 12.0        | 8                |
| 76      | glyceraldehyde-3-phosphate dehydrogenase                                                           | GAPDH    | P04406        | 36201 | 8.57 | 2004  | 37.0        | 64               |
|         | electron transfer flavoprotein subunit alpha                                                       | ETF A    | P13804        | 35400 | 8.62 | 1905  | 59.5        | 83               |
| 77      | triosephosphate isomerase                                                                          | TPI1     | P60174        | 26938 | 6.45 | 3315  | 69.5        | 119              |
| 78      | abhydrolase domain-containing protein 11                                                           | ABHD11   | Q8NFV4        | 34725 | 9.50 | 376   | 35.2        | 49               |
|         | carbonic anhydrase 2                                                                               | CA2      | P00918        | 29285 | 6.87 | 360   | 29.6        | 46               |
|         | hemoglobin subunit beta                                                                            | HBB      | P68871        | 16102 | 6.75 | 358   | 57.8        | 32               |
|         | trifunctional enzyme subunit beta                                                                  | HADHB    | P55084        | 51547 | 9.45 | 180   | 7.4         | 14               |
| 79      | hemoglobin subunit beta                                                                            | HBB      | P68871        | 16102 | 6.75 | 617   | 95.2        | 68               |
| 80      | superoxide dismutase                                                                               | SOD2     | P04179        | 24878 | 8.35 | 129   | 14.4        | 13               |
| 81      | ATP synthase subunit alpha                                                                         | ATP5A1   | P25705        | 59828 | 9.16 | 671   | 19.0        | 67               |
